# Supplementary figures and images for: Optical Genome Mapping for the Molecular Diagnosis of Facioscapulohumeral Muscular Dystrophy: Advancement and Challenges
Source: MDPI journal article supplement (doi:10.3390/biom13111567), 2023-10-24

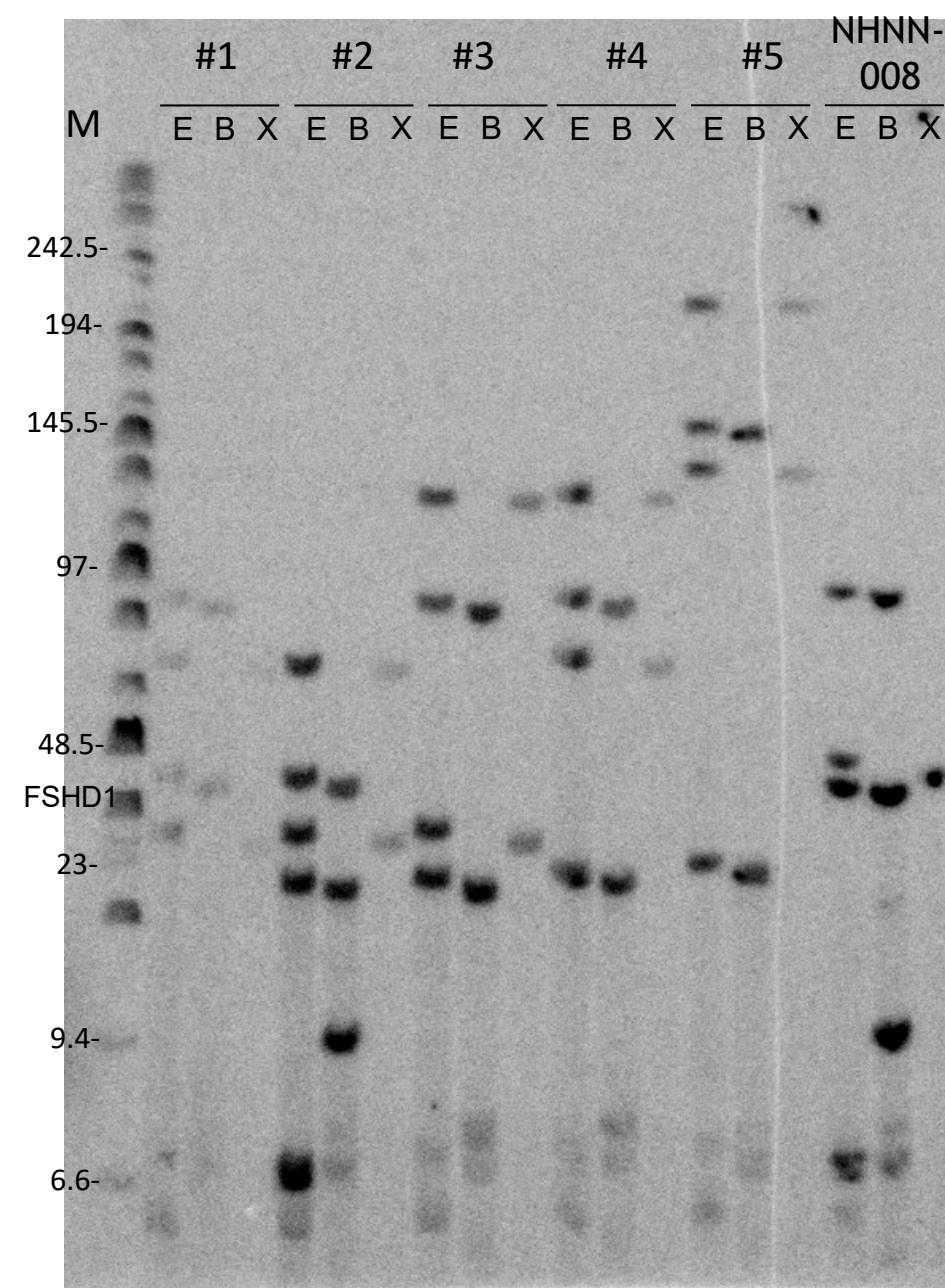

1) p13E-11

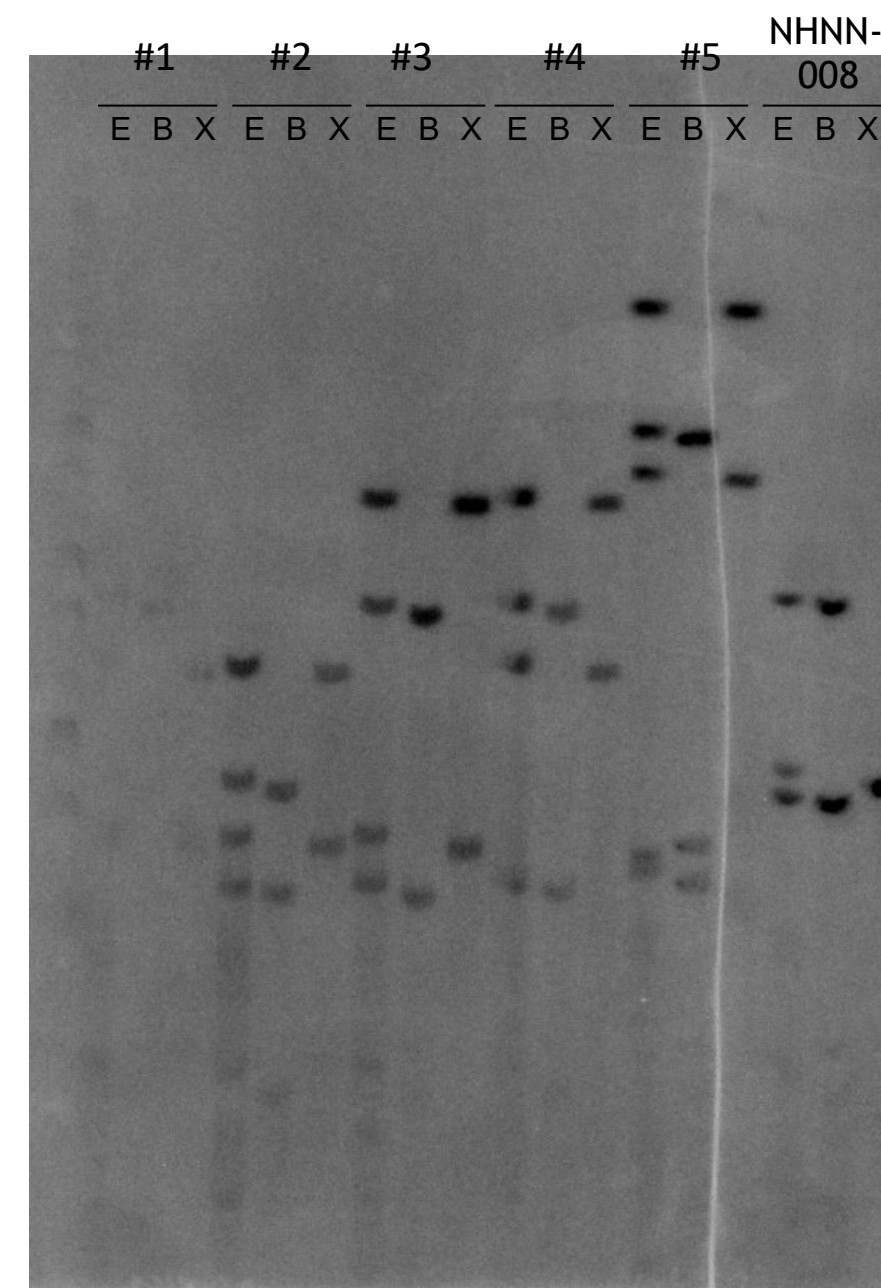

2) D4Z4

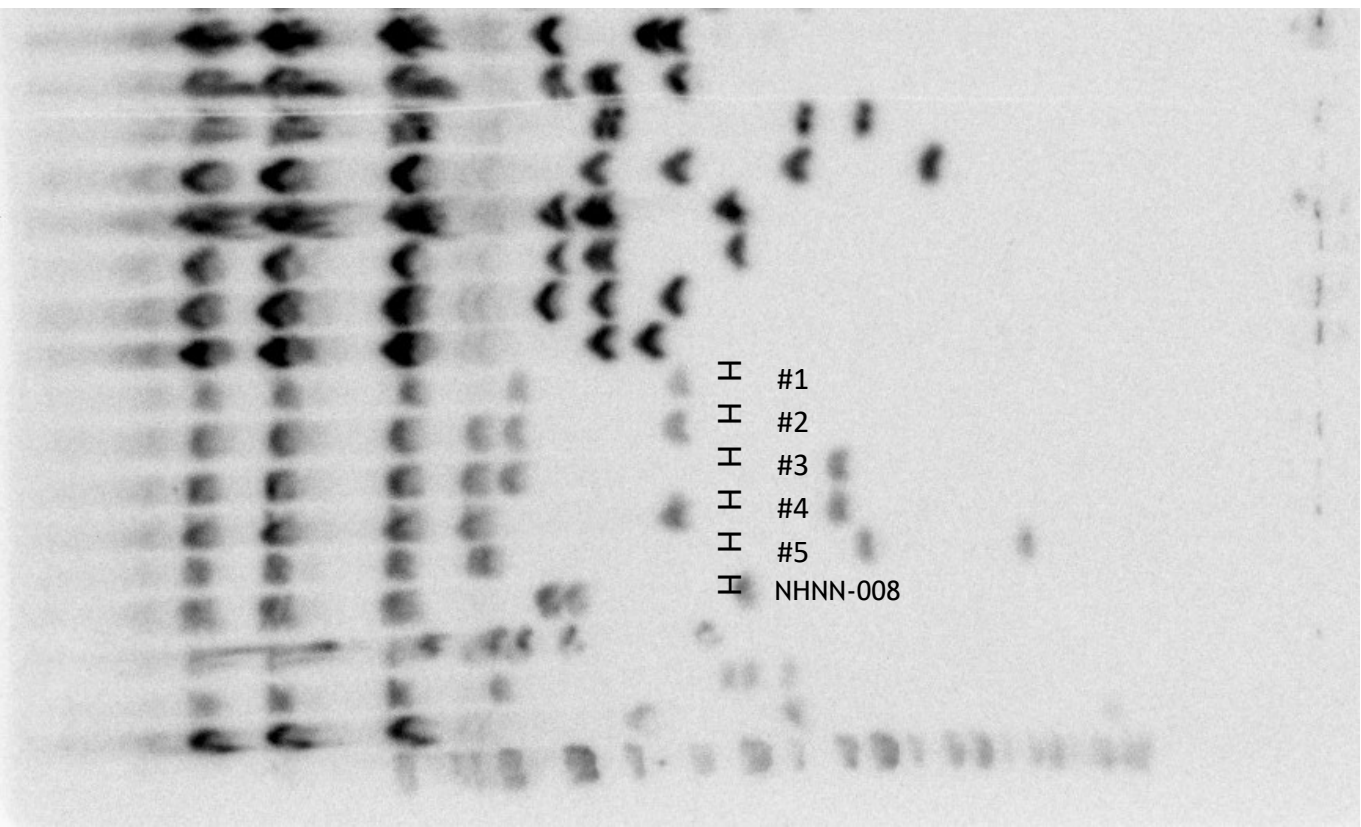

3) A

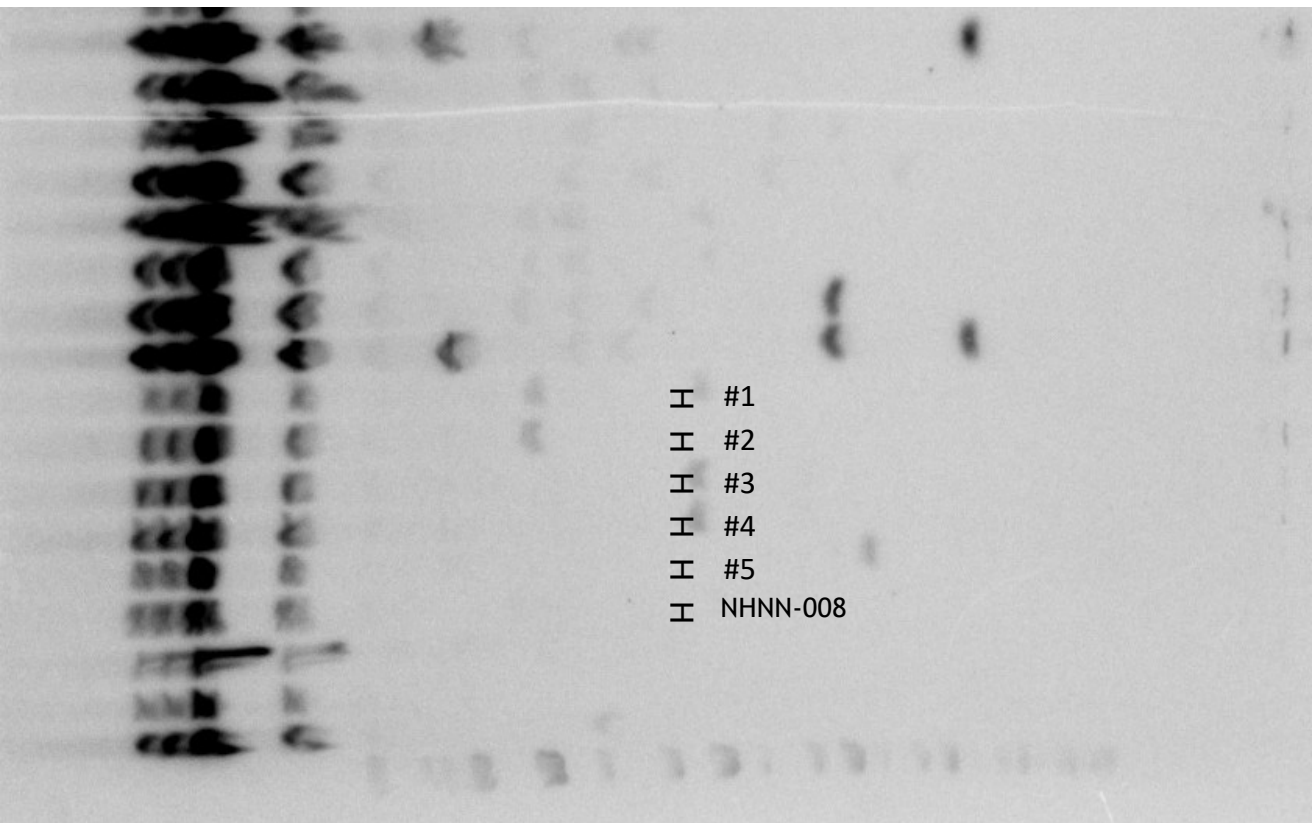

4) B

Figure S1: Original blot images.

Supplement: s1 [file s1]
